# Supplementary material for: Cep131 overexpression promotes centrosome amplification and colon cancer progression by regulating Plk4 stability
Source: PubMed Central journal article supplement (PMC6662699; doi:10.1038/s41419-019-1778-8), 2019-07-29
Supplement: 41419_2019_1778_MOESM2_ESM.pdf [file 41419_2019_1778_MOESM2_ESM.pdf]

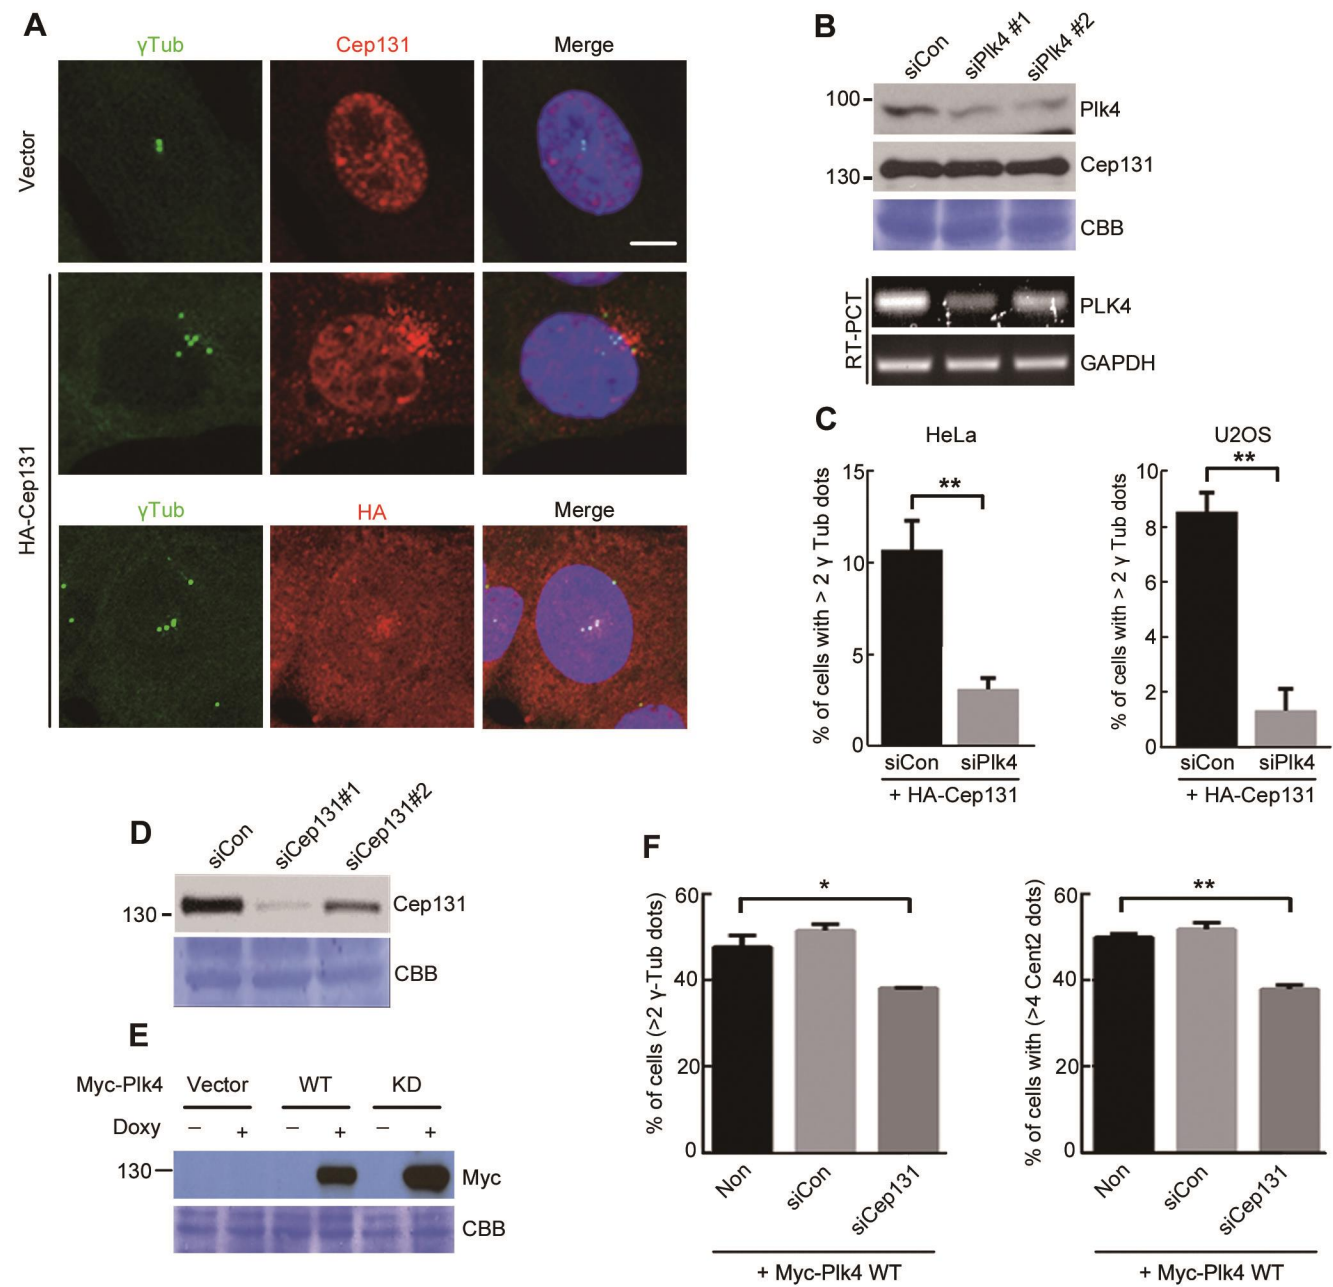

**Figure S1**

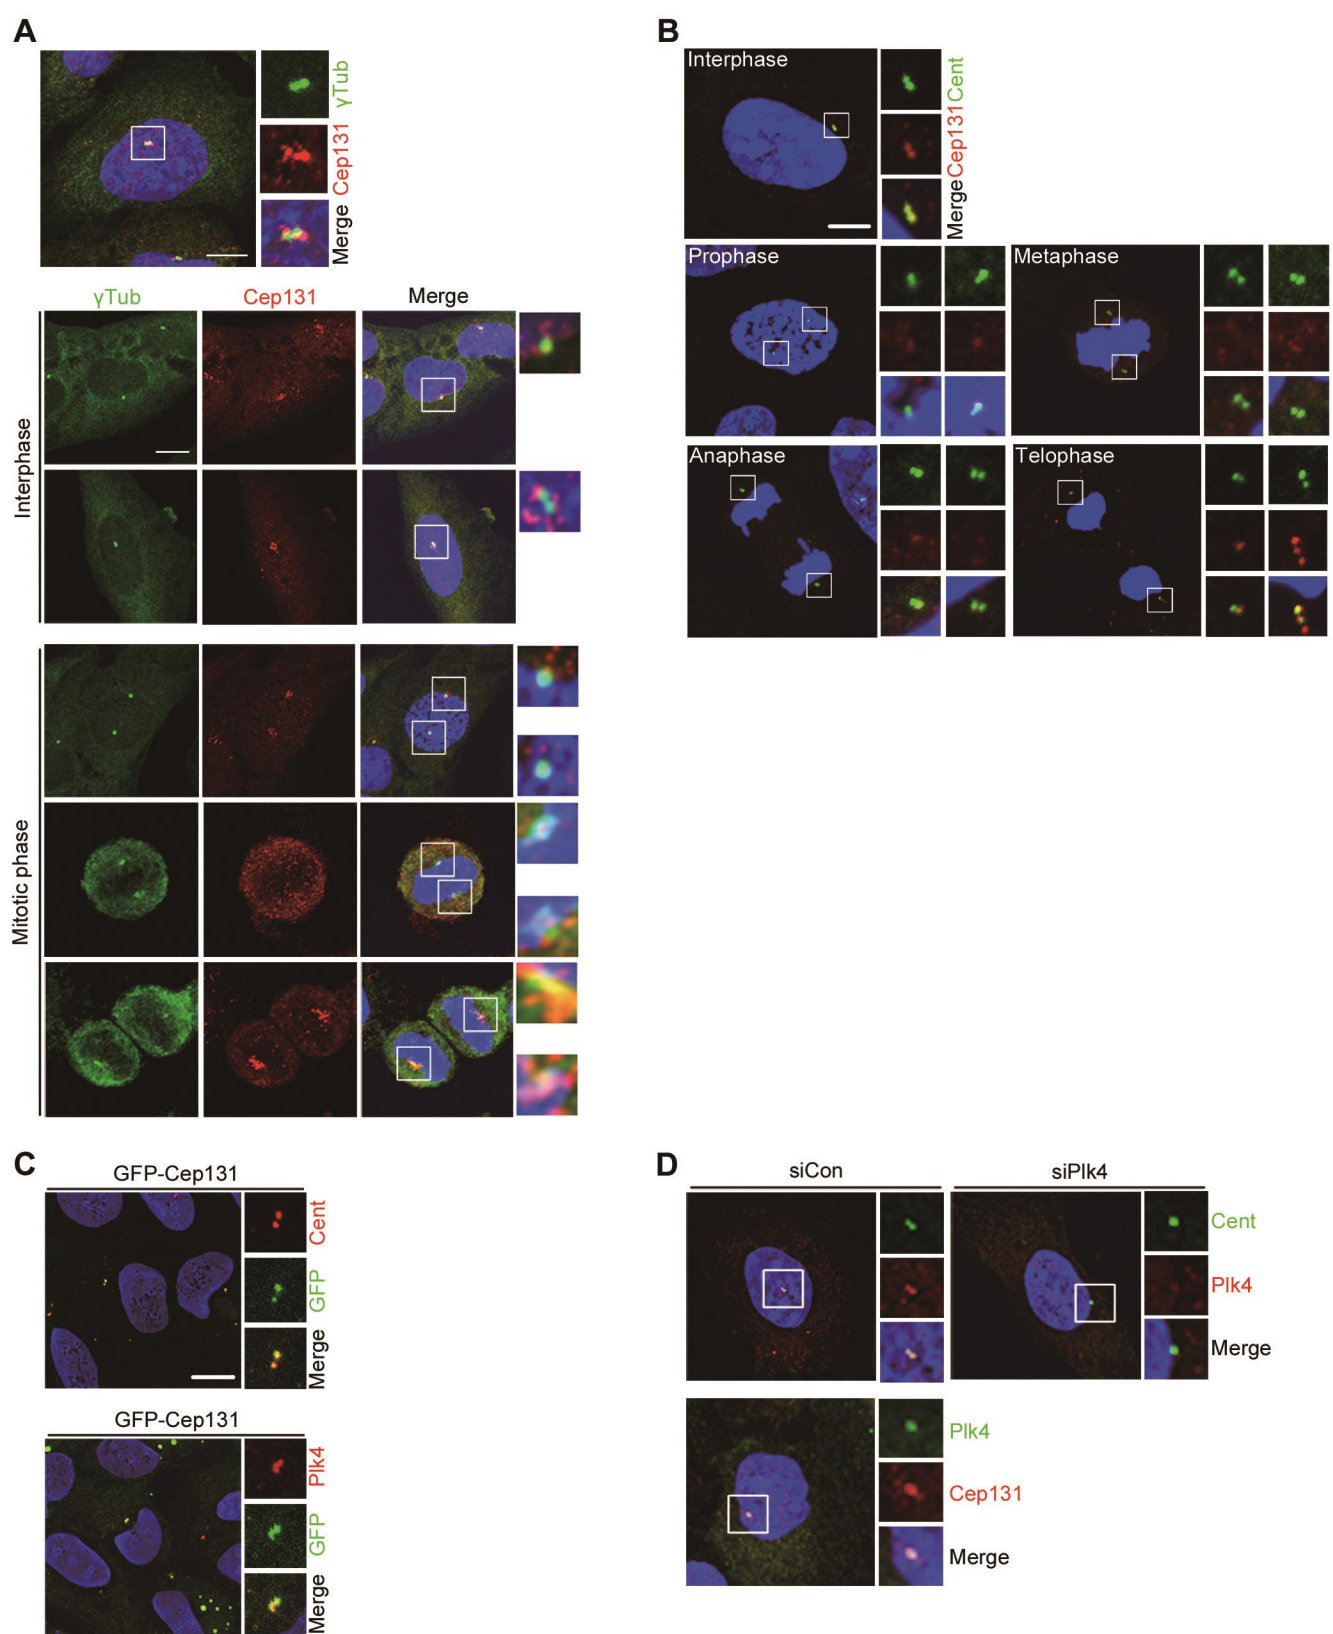

**A**

Cent+Ninein+Cep131

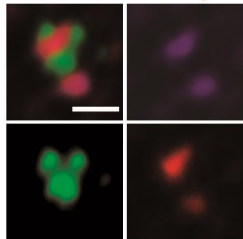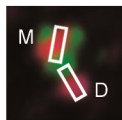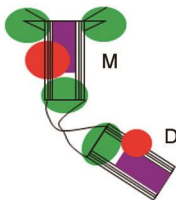**B**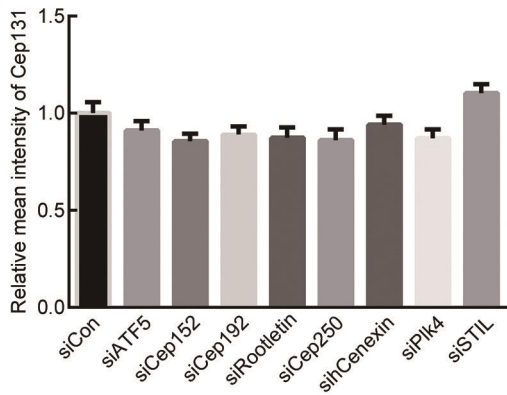**C**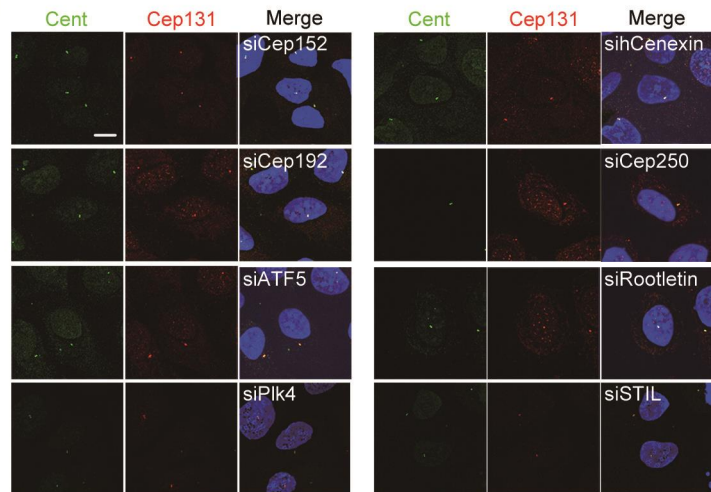**Figure S3**

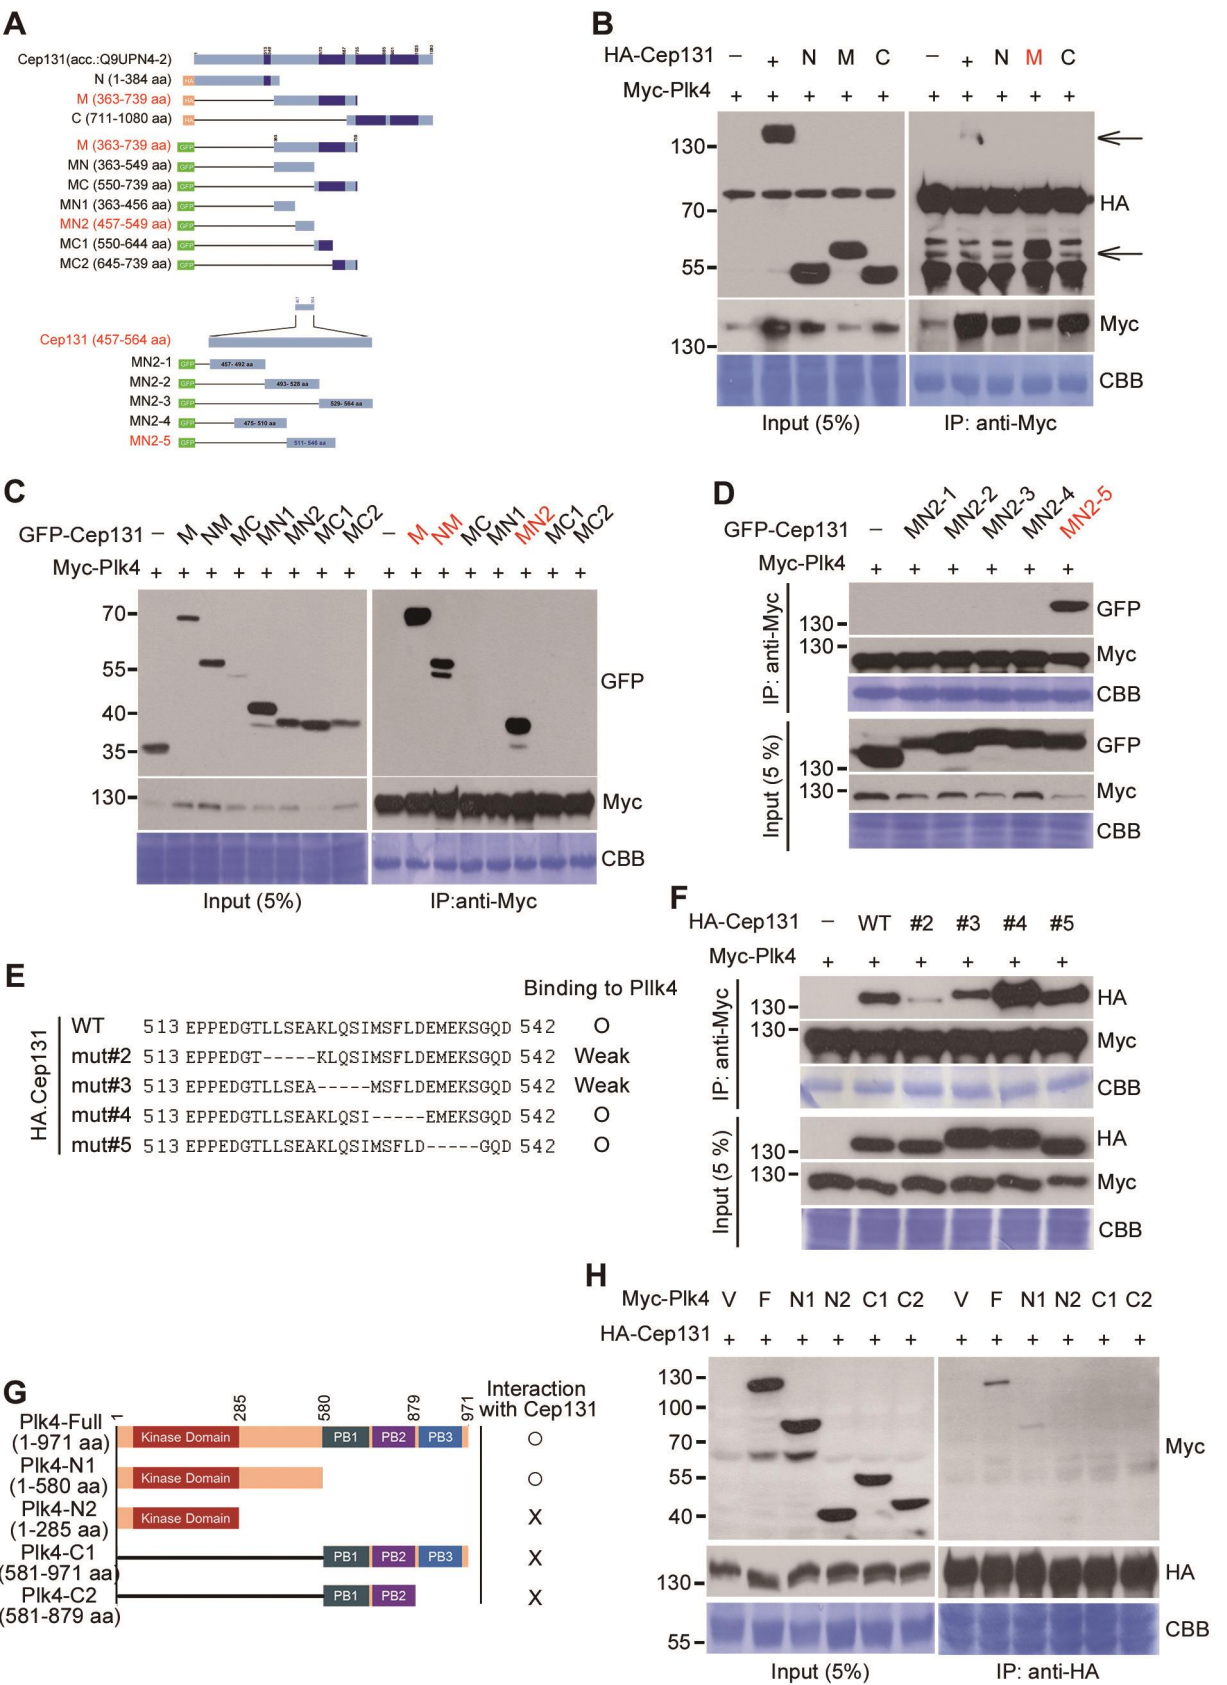

**Figure S4**

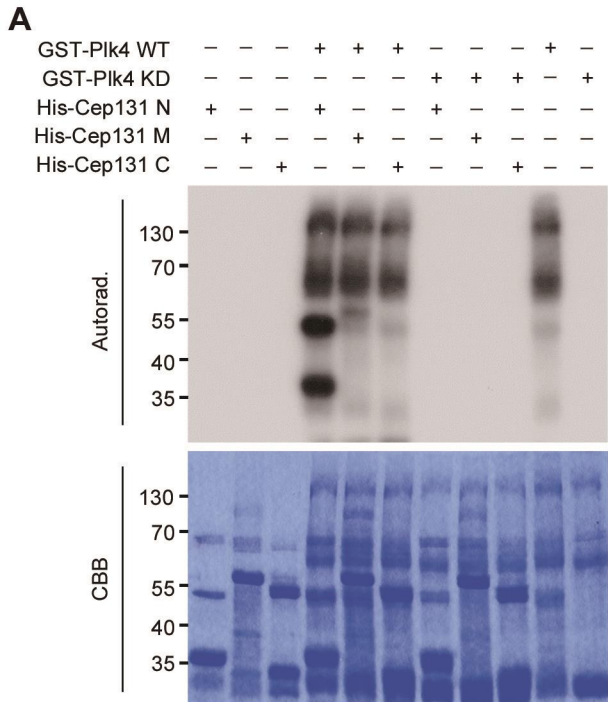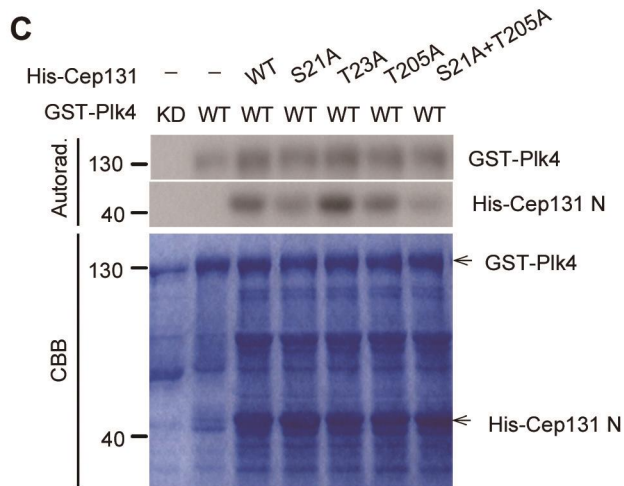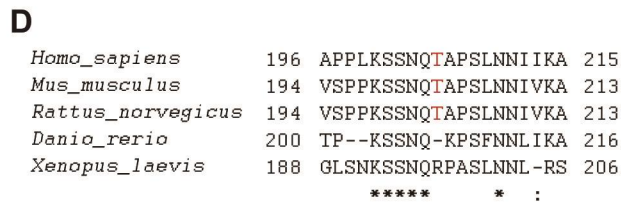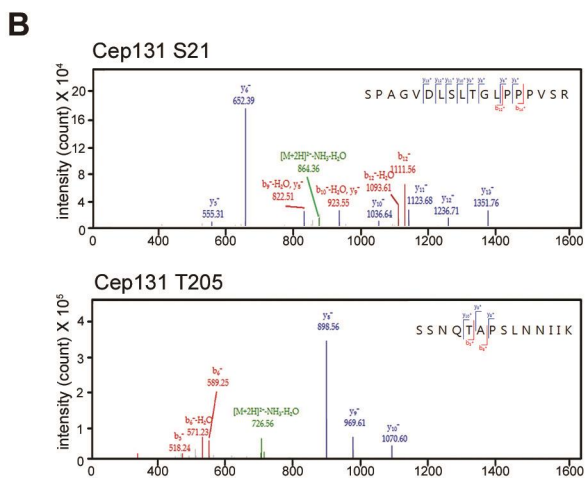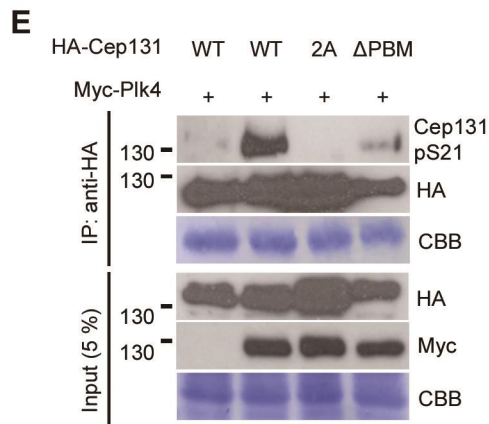

**Figure S5**

**A**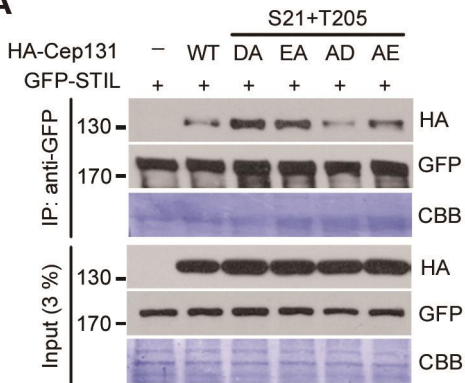**B**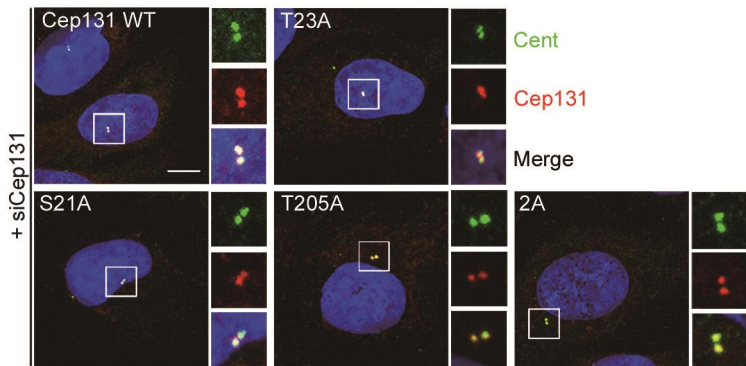**Figure S6**

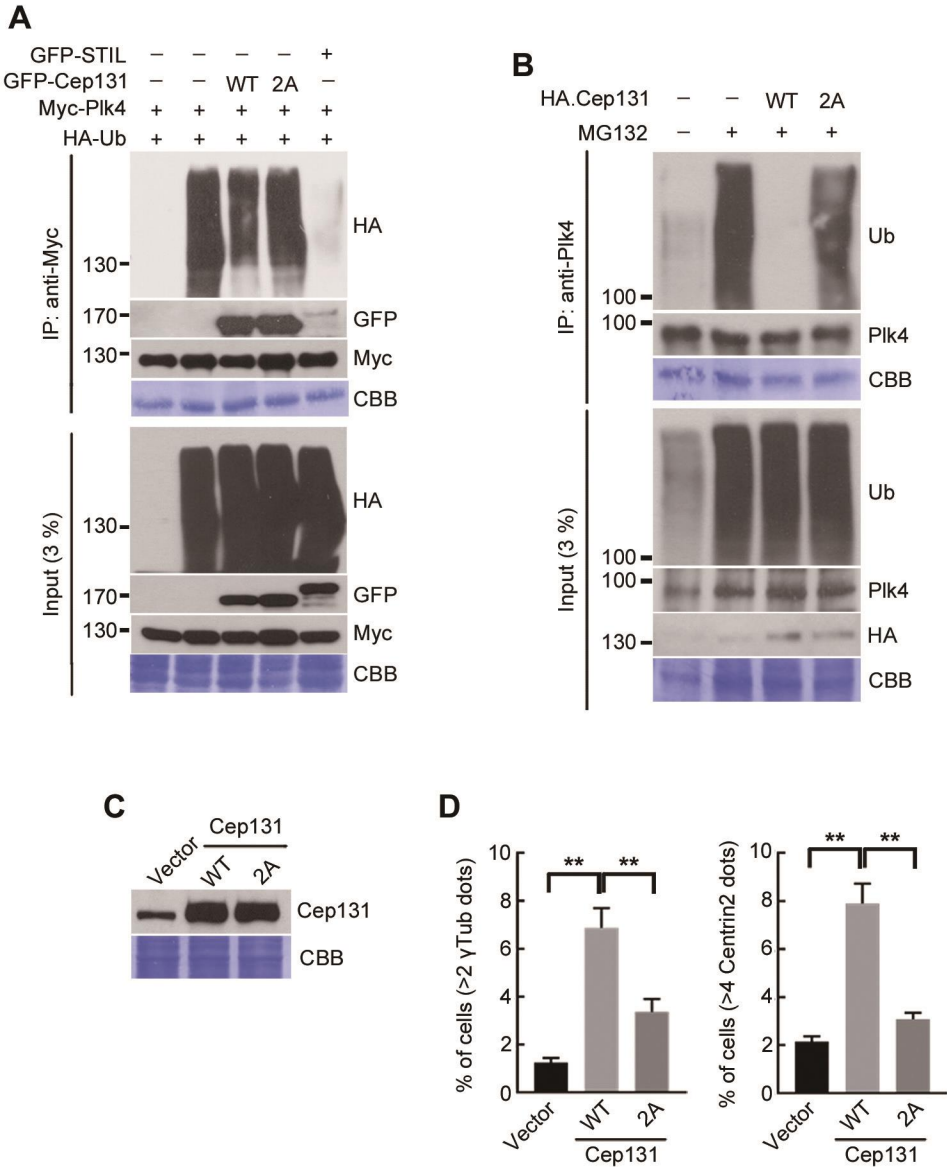

**Figure S7**

# A Disease summary for Cep131 (mRNA)

| Analysis Type by Cancer | Cancer Vs. Normal | Cancer vs. Cancer |     |              |     |   |
|-------------------------|-------------------|-------------------|-----|--------------|-----|---|
|                         |                   | Cancer Histology  |     | Multi-cancer |     |   |
|                         |                   |                   |     |              |     |   |
| Bladder Cancer          | 6                 |                   |     | 1            |     |   |
| Brain and CNS Cancer    |                   | 1                 | 1   | 1            |     |   |
| Breast Cancer           | 2                 | 1                 |     |              | 1   |   |
| Cervical Cancer         | 2                 |                   |     |              |     |   |
| Colorectal Cancer       | 9                 |                   |     |              |     |   |
| Esophageal Cancer       |                   |                   |     |              |     |   |
| Gastric Cancer          | 1                 |                   |     |              |     |   |
| Head and Neck Cancer    |                   |                   |     |              | 2   |   |
| Kidney Cancer           |                   |                   | 1   | 1            |     |   |
| Leukemia                |                   |                   | 1   | 1            |     |   |
| Liver Cancer            |                   |                   |     |              |     |   |
| Lung Cancer             | 1                 | 1                 |     |              |     |   |
| Lymphoma                |                   |                   |     |              |     |   |
| Melanoma                |                   |                   | 1   | 1            |     |   |
| Myeloma                 |                   |                   |     |              |     |   |
| Other Cancer            |                   |                   |     |              |     |   |
| Ovarian Cancer          |                   |                   |     |              |     |   |
| Pancreatic Cancer       |                   |                   |     |              |     |   |
| Prostate Cancer         |                   |                   |     |              |     |   |
| Sarcoma                 |                   |                   |     | 1            |     |   |
| Significant Analyses    | 21                | 3                 | 4   | 4            | 2   | 2 |
| Total Unique Analyses   | 271               |                   | 467 |              | 142 |   |

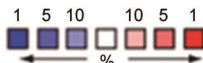

Cell color is determined by the best gene rank percentile for the analyses within the cell.

NOTE: An analysis may be counted in more than one cancer type.

# B

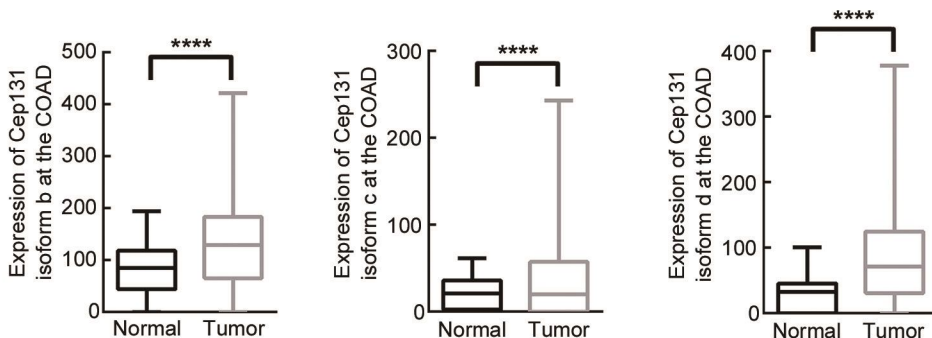

Figure S8



**A** Experimental schedule for Xenograft assay

Inject HCT116 cells (4 groups)

-Vec + shGL2

-Vec + shCep131

-Cep131 WT + shCep131

-Cep131 2A + shCep131

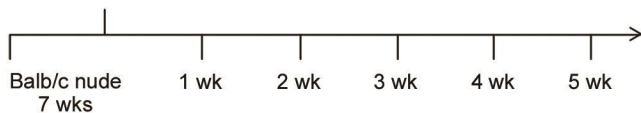

**C**

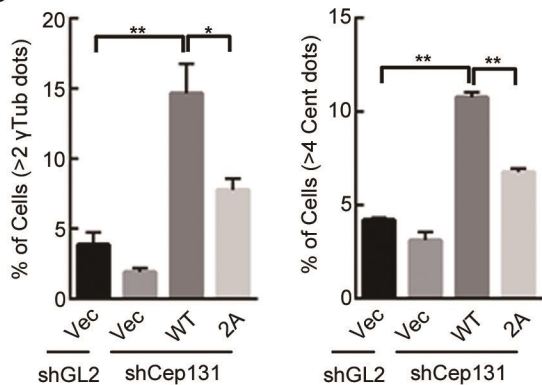

**B**

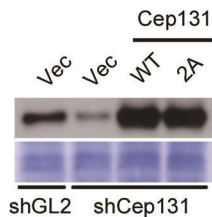

**D**

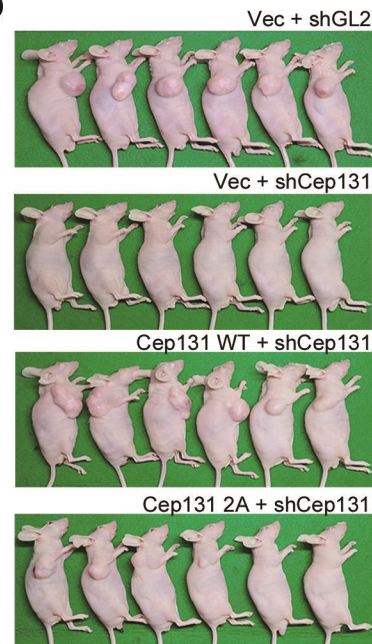

**Figure S9**
